# Supplementary material
Source: Springer Nature journal article supplement (https://www.springermedizin.de/resource/supplementary/12885_2010_2531_MOESM3_ESM.pdf/9462230)

A1

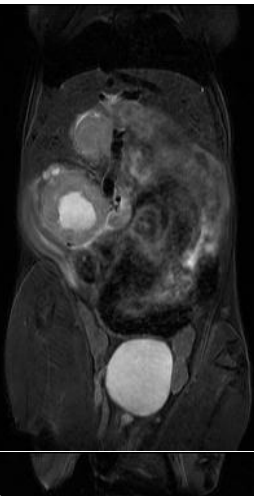

B1

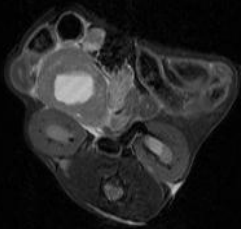

A2

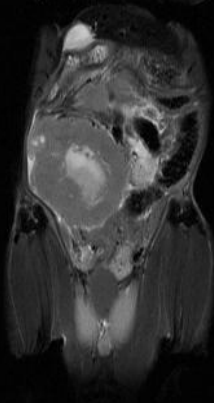

B2

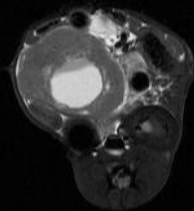

Supplement: MOESM3 [file 9462230]
